# Supplementary material
Source: PubMed Central journal article supplement (PMC10330424)
Supplement: NIHMS1898348-supplement-2.pdf [file NIHMS1898348-supplement-2.pdf]

**A**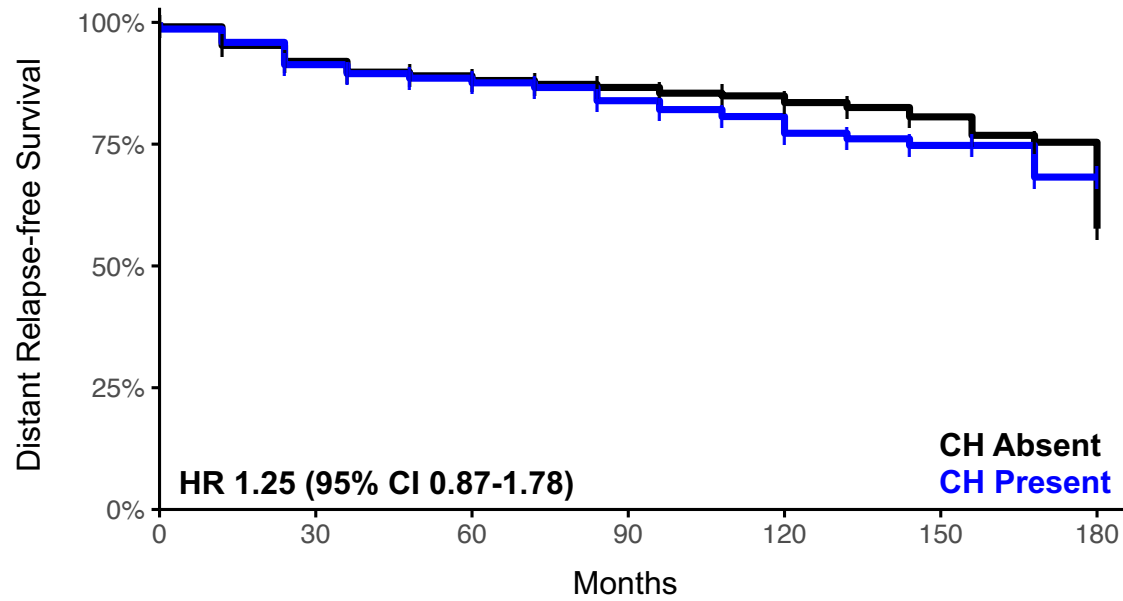

|                   |     |     |     |     |     |    |    |
|-------------------|-----|-----|-----|-----|-----|----|----|
| <b>CH Absent</b>  | 551 | 499 | 461 | 368 | 247 | 85 | 17 |
| <b>CH Present</b> | 219 | 198 | 185 | 138 | 94  | 41 | 6  |

**B**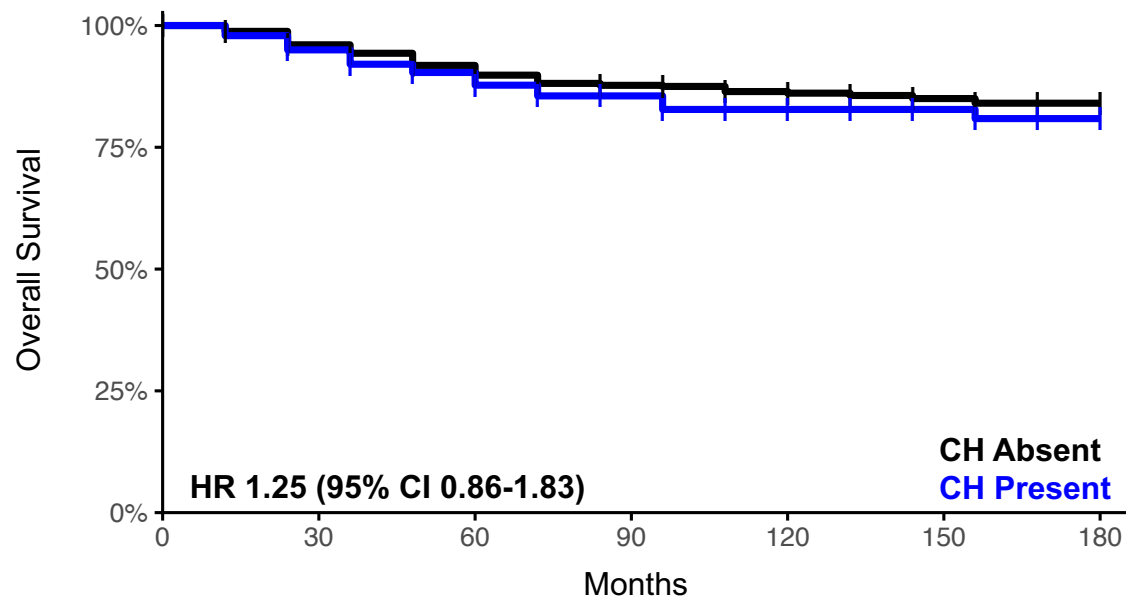

|                   |     |     |     |     |     |    |    |
|-------------------|-----|-----|-----|-----|-----|----|----|
| <b>CH Absent</b>  | 583 | 552 | 504 | 394 | 264 | 89 | 19 |
| <b>CH Present</b> | 240 | 226 | 208 | 154 | 104 | 44 | 7  |

### Supplemental Figure S2: Associations between Clonal Hematopoiesis (CH) and Survival in the YWS.

(A-B) Comparison of breast cancer recurrence free (C) and overall (D) survival between individuals with any clonal hematopoietic mutation identified (blue) and all others (black).
