# Supplementary material
Source: PubMed Central journal article supplement (PMC10330424)
Supplement: NIHMS1898348-supplement-4.pdf [file NIHMS1898348-supplement-4.pdf]

**Supplemental Table S1. Genes Sequenced from One-Year Blood Samples**

|          |         |        |         |        |
|----------|---------|--------|---------|--------|
| ASXL1    | CSNK1A5 | IDH2   | PIGA    | SRSF2  |
| ATM      | CSNK1A6 | IKZF1  | PIGT    | STAG1  |
| ATRX     | CSNK1A7 | JAK2   | PPM1D   | STAG2  |
| B2M      | CSNK1A8 | JAK3   | PRPF40B | STAT3  |
| BCOR     | CSNK1A9 | KIT    | PRPF8   | STAT5B |
| BCORL1   | CTCF    | KRAS   | PTEN    | TERC   |
| BRAF     | CUX1    | LUC7L2 | PTPN11  | TERT   |
| BRCC3    | DDX41   | MIR142 | RAD21   | TET2   |
| CALR     | DNMT3A  | MPL    | RIT1    | TP53   |
| CBL      | EP300   | MRE11A | RPL11   | U2AF1  |
| CBLB     | ETNK1   | MYC    | RPS7    | U2AF2  |
| CEBPA    | ETV6    | MYD88  | RUNX1   | VPS45  |
| CREBBP   | EZH2    | MYH9   | SETBP1  | WT1    |
| CSF1R    | FANCL   | NF1    | SETD2   | YLPM1  |
| CSF3R    | FLT3    | NOTCH1 | SF1     | ZBTB33 |
| CSNK1A1  | FP SNP  | NOTCH2 | SF3A1   | ZNF318 |
| CSNK1A10 | GATA1   | NPM1   | SF3B1   | ZRSR2  |
| CSNK1A11 | GATA2   | NRAS   | SH2B3   |        |
| CSNK1A2  | GNAS    | PDS5B  | SMC1A   |        |
| CSNK1A3  | GNB1    | PHF6   | SMC3    |        |
| CSNK1A4  | IDH1    | PHIP   | SRCAP   |        |
