# Supplementary material
Source: PubMed Central journal article supplement (PMC10330424)
Supplement: NIHMS1898348-supplement-5.pdf [file NIHMS1898348-supplement-5.pdf]

**Supplemental Table S2. Genes Sequenced from Paired Baseline and Four-Year Blood Samples**

|       |        |        |        |        |
|-------|--------|--------|--------|--------|
| ASXL1 | ASXL2  | BRCC3  | CBL    | DNMT3A |
| ETNK1 | GNAS   | GNB1   | IDH1   | IDH2   |
| JAK2  | KIT    | KRAS   | MPL    | NRAS   |
| PPM1D | SETBP1 | SF3B1  | SRSF2  | TET2   |
| TP53  | U2AF1  | ZBTB33 | ZNF318 |        |
