# Supplementary material
Source: PubMed Central journal article supplement (PMC10330424)
Supplement: NIHMS1898348-supplement-8.pdf [file NIHMS1898348-supplement-8.pdf]

**Supplemental Table S5. Cohort Characteristics Broken Down by CH (Any VAF)**

|                   |                 | CH+<br>(n=252) |          | CH-<br>(n=626) |          | p-value |
|-------------------|-----------------|----------------|----------|----------------|----------|---------|
| Age at blood draw | (median, range) | 39             | [25, 42] | 37             | [22, 42] | < 0.001 |
| Smoking Status    | Never           | 142            | 56%      | 371            | 59%      | 0.799*  |
|                   | Current/Former  | 74             | 29%      | 184            | 29%      |         |
|                   | Unknown         | 36             | 14%      | 71             | 11%      |         |
| Cancer Stage      | 0               | 12             | 5%       | 43             | 7%       | 0.264   |
|                   | I               | 69             | 27%      | 200            | 32%      |         |
|                   | II              | 112            | 44%      | 249            | 40%      |         |
|                   | III             | 41             | 16%      | 104            | 17%      |         |
|                   | IV              | 18             | 7%       | 30             | 5%       |         |
| Surgery           | Yes             | 219            | 87%      | 544            | 87%      | >0.999  |
|                   | Unknown         | 33             | 13%      | 83             | 13%      |         |
| Radiation         | Yes             | 122            | 48%      | 305            | 49%      | 0.941   |
|                   | No              | 130            | 52%      | 321            | 51%      |         |
| Chemotherapy      | Yes             | 190            | 75%      | 484            | 77%      | 0.538   |
|                   | No              | 62             | 25%      | 142            | 23%      |         |
| Hormone Therapy   | Yes             | 147            | 58%      | 346            | 55%      | 0.432*  |
|                   | No              | 63             | 25%      | 172            | 27%      |         |
|                   | Unknown         | 42             | 17%      | 108            | 17%      |         |

\*p-value estimated excluding the unknown group

Age was tested using a Wilcoxon Rank-Sum test, all other variables were tested with a Fisher's Exact test.
