# Supplementary material
Source: PubMed Central journal article supplement (PMC10330424)
Supplement: NIHMS1898348-supplement-9.pdf [file NIHMS1898348-supplement-9.pdf]

**Supplemental Table S6. P53 or PPM1D Mutations And Prior Cytotoxic Exposure**

|                                     | Prior<br>Chemotherapy |     |    |            |
|-------------------------------------|-----------------------|-----|----|------------|
|                                     | Yes                   | No  |    |            |
| TP53 or PPM1D<br>Mutation (Any VAF) | Present               | 22  | 2  | p = 0.077* |
|                                     | Absent                | 168 | 60 |            |

|                                     | Prior Radiation |     |     |            |
|-------------------------------------|-----------------|-----|-----|------------|
|                                     | Yes             | No  |     |            |
| TP53 or PPM1D<br>Mutation (Any VAF) | Present         | 16  | 8   | p = 0.085* |
|                                     | Absent          | 106 | 122 |            |

|                                     | Prior<br>Chemotherapy or<br>Radiation |     |    |           |
|-------------------------------------|---------------------------------------|-----|----|-----------|
|                                     | Yes                                   | No  |    |           |
| TP53 or PPM1D<br>Mutation (Any VAF) | Present                               | 23  | 1  | p = 0.32* |
|                                     | Absent                                | 197 | 30 |           |

\*p-value calculated using a Fisher's exact test.
