# Supplementary material
Source: PubMed Central journal article supplement (PMC10330424)
Supplement: NIHMS1898348-supplement-10.pdf [file NIHMS1898348-supplement-10.pdf]

**Supplemental Table S7. Possible germline mutations (VAF > 0.35) predicted to impair protein function via premature stop (nonsense), splicing alterations, or a frameshift.**

| <b>Gene</b>  | <b>DNA Change</b> | <b>Amino Acid Change</b> | <b>Effect</b> | <b>VAF</b> |
|--------------|-------------------|--------------------------|---------------|------------|
| <i>ATM</i>   | c.A8266T          | p.K2756X                 | Nonsense      | 0.5064     |
| <i>ATM</i>   | c.633delC         | p.D211fs                 | Frameshift    | 0.4824     |
| <i>ATM</i>   | c.8800delA        | p.T2934fs                | Frameshift    | 0.4818     |
| <i>ATM</i>   | c.902-1G>T        |                          | Splicing      | 0.4583     |
| <i>ATM</i>   | c.2284_2285del    | p.L762fs                 | Frameshift    | 0.4451     |
| <i>ATM</i>   | c.3704_3708del    | p.P1235fs                | Frameshift    | 0.4122     |
| <i>ATM</i>   | c.8384_8393del    | p.D2795fs                | Frameshift    | 0.3633     |
| <i>NF1</i>   | c.C2446T          | p.R816X                  | Nonsense      | 0.4691     |
| <i>PDS5B</i> | c.4308+1G>T       |                          | Splicing      | 0.4885     |
| <i>SETD2</i> | c.C19T            | p.Q7X                    | Nonsense      | 0.4605     |
| <i>SH2B3</i> | c.G785A           | p.W262X                  | Nonsense      | 0.4727     |
| <i>SRCAP</i> | c.3542-1G>C       |                          | Splicing      | 0.4977     |
| <i>TET2</i>  | c.C3470A          | p.S1157X                 | Nonsense      | 0.505      |
| <i>TP53</i>  | c.C637T           | p.R213X                  | Nonsense      | 0.368      |
| <i>TP53</i>  | c.366_367del      | p.V122fs                 | Frameshift    | 0.3674     |
